# Supplementary material
Source: PubMed Central journal article supplement (PMC10636650)
Supplement: jamaoncol-e234845-s001.pdf [file jamaoncol-e234845-s001.pdf]

## Supplemental Online Content

Loria A, Tejani MA, Temple LK, et al. Practice patterns for organ preservation in US patients with rectal cancer, 2006-2020. *JAMA Oncol*. Published online November 9, 2023. doi:10.1001/jamaoncol.2023.4845

**eFigure.** Derivation of the cohort

**eTable 1.** STROBE Statement

**eTable 2.** Type and sequence of multimodal therapy over time

This supplemental material has been provided by the authors to give readers additional information about their work.

**eFigure 1. Derivation of the cohort**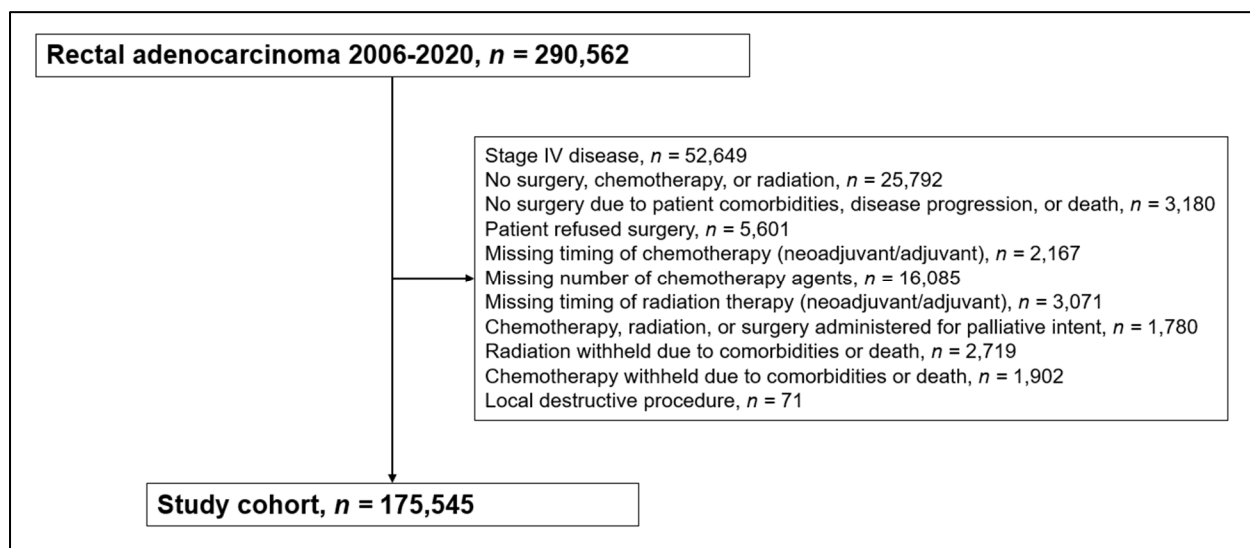

**eTable 1. STROBE Statement**

|                          | Item No | Recommendation                                                                                                                                                                                                                                                                                                                                                                                                                                                         | Page      |
|--------------------------|---------|------------------------------------------------------------------------------------------------------------------------------------------------------------------------------------------------------------------------------------------------------------------------------------------------------------------------------------------------------------------------------------------------------------------------------------------------------------------------|-----------|
| Title and abstract       | 1       | (a) Indicate the study's design with a commonly used term in the title or the abstract                                                                                                                                                                                                                                                                                                                                                                                 | 2         |
|                          |         | (b) Provide in the abstract an informative and balanced summary of what was done and what was found                                                                                                                                                                                                                                                                                                                                                                    | 2,3       |
| Introduction             |         |                                                                                                                                                                                                                                                                                                                                                                                                                                                                        |           |
| Background/rationale     | 2       | Explain the scientific background and rationale for the investigation being reported                                                                                                                                                                                                                                                                                                                                                                                   | 3-6       |
| Objectives               | 3       | State specific objectives, including any prespecified hypotheses                                                                                                                                                                                                                                                                                                                                                                                                       | 4-6       |
| Methods                  |         |                                                                                                                                                                                                                                                                                                                                                                                                                                                                        |           |
| Study design             | 4       | Present key elements of study design early in the paper                                                                                                                                                                                                                                                                                                                                                                                                                | 7         |
| Setting                  | 5       | Describe the setting, locations, and relevant dates, including periods of recruitment, exposure, follow-up, and data collection                                                                                                                                                                                                                                                                                                                                        | 7         |
| Participants             | 6       | (a) <i>Cohort study</i> —Give the eligibility criteria, and the sources and methods of selection of participants. Describe methods of follow-up<br><i>Case-control study</i> —Give the eligibility criteria, and the sources and methods of case ascertainment and control selection. Give the rationale for the choice of cases and controls<br><i>Cross-sectional study</i> —Give the eligibility criteria, and the sources and methods of selection of participants | 7         |
|                          |         | (b) <i>Cohort study</i> —For matched studies, give matching criteria and number of exposed and unexposed<br><i>Case-control study</i> —For matched studies, give matching criteria and the number of controls per case                                                                                                                                                                                                                                                 | NA        |
| Variables                | 7       | Clearly define all outcomes, exposures, predictors, potential confounders, and effect modifiers. Give diagnostic criteria, if applicable                                                                                                                                                                                                                                                                                                                               | 7,8       |
| Data sources/measurement | 8*      | For each variable of interest, give sources of data and details of methods of assessment (measurement). Describe comparability of assessment methods if there is more than one group                                                                                                                                                                                                                                                                                   | 7,8       |
| Bias                     | 9       | Describe any efforts to address potential sources of bias                                                                                                                                                                                                                                                                                                                                                                                                              | 7,8       |
| Study size               | 10      | Explain how the study size was arrived at                                                                                                                                                                                                                                                                                                                                                                                                                              | eFigure 1 |
| Quantitative variables   | 11      | Explain how quantitative variables were handled in the analyses. If applicable, describe which groupings were chosen and why                                                                                                                                                                                                                                                                                                                                           | 8         |
| Statistical methods      | 12      | (a) Describe all statistical methods, including those used to control for confounding                                                                                                                                                                                                                                                                                                                                                                                  | 8         |
|                          |         | (b) Describe any methods used to examine subgroups and interactions                                                                                                                                                                                                                                                                                                                                                                                                    | 8         |
|                          |         | (c) Explain how missing data were addressed                                                                                                                                                                                                                                                                                                                                                                                                                            | 8         |
|                          |         | (d) <i>Cohort study</i> —If applicable, explain how loss to follow-up was addressed<br><i>Case-control study</i> —If applicable, explain how matching of cases and controls was addressed<br><i>Cross-sectional study</i> —If applicable, describe analytical methods taking account of sampling strategy                                                                                                                                                              | NA        |
|                          |         | (e) Describe any sensitivity analyses                                                                                                                                                                                                                                                                                                                                                                                                                                  | 8         |
| Results                  |         |                                                                                                                                                                                                                                                                                                                                                                                                                                                                        |           |

|                          |     |                                                                                                                                                                                                              |                 |
|--------------------------|-----|--------------------------------------------------------------------------------------------------------------------------------------------------------------------------------------------------------------|-----------------|
| Participants             | 13* | (a) Report numbers of individuals at each stage of study—eg numbers potentially eligible, examined for eligibility, confirmed eligible, included in the study, completing follow-up, and analyzed            | 9,10; eFigure 1 |
|                          |     | (b) Give reasons for non-participation at each stage                                                                                                                                                         | 10              |
|                          |     | (c) Consider use of a flow diagram                                                                                                                                                                           | eFigure 1       |
| Descriptive data         | 14* | (a) Give characteristics of study participants (eg demographic, clinical, social) and information on exposures and potential confounders                                                                     | 9               |
|                          |     | (b) Indicate number of participants with missing data for each variable of interest                                                                                                                          | 9, Table 1      |
|                          |     | (c) <i>Cohort study</i> —Summarize follow-up time (eg, average and total amount)                                                                                                                             | NA              |
| Outcome data             | 15* | <i>Cohort study</i> —Report numbers of outcome events or summary measures over time                                                                                                                          | NA              |
|                          |     | <i>Case-control study</i> —Report numbers in each exposure category, or summary measures of exposure                                                                                                         | NA              |
|                          |     | <i>Cross-sectional study</i> —Report numbers of outcome events or summary measures                                                                                                                           | NA              |
| Main results             | 16  | (a) Give unadjusted estimates and, if applicable, confounder-adjusted estimates and their precision (eg, 95% confidence interval). Make clear which confounders were adjusted for and why they were included | 9-10            |
|                          |     | (b) Report category boundaries when continuous variables were categorized                                                                                                                                    | Table 1         |
|                          |     | (c) If relevant, consider translating estimates of relative risk into absolute risk for a meaningful time period                                                                                             | NA              |
| Other analyses           | 17  | Report other analyses done—eg analyses of subgroups and interactions, and sensitivity analyses                                                                                                               | 9-10            |
| Discussion               |     |                                                                                                                                                                                                              |                 |
| Key results              | 18  | Summarize key results with reference to study objectives                                                                                                                                                     | 11              |
| Limitations              | 19  | Discuss limitations of the study, taking into account sources of potential bias or imprecision. Discuss both direction and magnitude of any potential bias                                                   | 11-14           |
| Interpretation           | 20  | Give a cautious overall interpretation of results considering objectives, limitations, multiplicity of analyses, results from similar studies, and other relevant evidence                                   | 11-14           |
| Generalizability         | 21  | Discuss the generalizability (external validity) of the study results                                                                                                                                        | 11-14           |
| <b>Other information</b> |     |                                                                                                                                                                                                              |                 |
| Funding                  | 22  | Give the source of funding and the role of the funders for the present study and, if applicable, for the original study on which the present article is based                                                | None            |

**eTable 2. Type and sequence of multimodal therapy over time**

| Type and sequence of therapy, No. (%)                                | 2006-2008     | 2009-2011     | 2012-2014     | 2015-2017     | 2018-2020     |
|----------------------------------------------------------------------|---------------|---------------|---------------|---------------|---------------|
| <b>Clinical Stage I</b>                                              | n = 5,492     | n = 7,138     | n = 6,760     | n = 6,060     | n = 5,143     |
| Surgery alone                                                        | 2,535 (46.16) | 3,635 (50.92) | 3,542 (52.4)  | 3,323 (54.83) | 2,863 (55.14) |
| Radiation alone                                                      | 781 (14.22)   | 904 (12.66)   | 875 (12.94)   | 726 (11.98)   | 582 (11.32)   |
| Surgery → adjuvant radiation                                         | 552 (10.05)   | 774 (10.84)   | 719 (10.64)   | 628 (10.36)   | 500 (9.72)    |
| Surgery → adjuvant chemotherapy                                      | 130 (2.37)    | 226 (3.17)    | 296 (4.38)    | 367 (6.06)    | 385 (7.49)    |
| Neoadjuvant radiation → surgery <sup>a</sup>                         | 803 (14.62)   | 798 (11.18)   | 683 (10.1)    | 514 (8.48)    | 359 (6.98)    |
| Neoadjuvant radiation → surgery → adjuvant chemotherapy <sup>a</sup> | 296 (5.39)    | 386 (5.41)    | 338 (5.00)    | 236 (3.89)    | 181 (3.52)    |
| Multi-agent chemotherapy & radiation alone                           | 89 (1.62)     | 114 (1.16)    | 104 (1.54)    | 105 (1.73)    | 142 (2.76)    |
| Multi-agent chemotherapy & radiation → surgery <sup>a</sup>          | 266 (4.84)    | 254 (3.56)    | 145 (2.14)    | 91 (1.5)      | 92 (1.79)     |
| Neoadjuvant chemotherapy → surgery <sup>a</sup>                      | 33 (0.6)      | 37 (0.52)     | 52 (0.77)     | 64 (1.06)     | 60 (1.17)     |
| Chemotherapy alone                                                   | 7 (0.13)      | 10 (0.14)     | 6 (0.09)      | 6 (0.1)       | 6 (0.12)      |
| <b>Clinical Stage II-III</b>                                         | n = 12,760    | n = 17,168    | n = 20,975    | n = 23,566    | n = 25,330    |
| Neoadjuvant radiation → surgery → adjuvant chemotherapy <sup>a</sup> | 2,751 (21.56) | 4,760 (27.73) | 6,419 (30.6)  | 7,577 (32.15) | 6,361 (25.11) |
| Multi-agent chemotherapy & radiation → surgery <sup>a</sup>          | 1,769 (13.86) | 2,012 (11.72) | 2,181 (10.4)  | 2,486 (10.55) | 5,634 (22.24) |
| Neoadjuvant radiation → surgery <sup>a</sup>                         | 4,308 (33.76) | 5,577 (32.48) | 7,029 (33.51) | 7,199 (30.55) | 5,180 (20.45) |
| Radiation alone                                                      | 1,560 (12.23) | 1,945 (11.33) | 2,499 (11.91) | 3,054 (12.96) | 3,287 (12.98) |
| Multi-agent chemotherapy & radiation alone                           | 546 (4.28)    | 561 (3.27)    | 772 (3.68)    | 1,263 (5.36)  | 2,931 (11.57) |
| Surgery alone                                                        | 725 (5.68)    | 966 (5.63)    | 865 (4.12)    | 773 (3.28)    | 745 (2.94)    |
| Neoadjuvant chemotherapy → surgery <sup>a</sup>                      | 106 (0.83)    | 176 (1.03)    | 279 (1.33)    | 547 (2.32)    | 600 (2.37)    |
| Surgery → adjuvant chemotherapy                                      | 192 (1.5)     | 295 (1.72)    | 352 (1.68)    | 320 (1.36)    | 330 (1.3)     |
| Surgery → adjuvant radiation                                         | 797 (6.25)    | 864 (5.03)    | 565 (2.69)    | 334 (1.42)    | 239 (0.94)    |
| Chemotherapy alone                                                   | 6 (0.05)      | 12 (0.07)     | 14 (0.07)     | 13 (0.06)     | 23 (0.09)     |

| <b>Unknown Clinical Stage</b>                                                                                                                          | <b>n = 13,361</b> | <b>n = 7,637</b> | <b>n = 7,241</b> | <b>n = 8,664</b> | <b>n = 8,250</b> |
|--------------------------------------------------------------------------------------------------------------------------------------------------------|-------------------|------------------|------------------|------------------|------------------|
| Surgery alone                                                                                                                                          | 5,068 (37.93)     | 3,032 (39.7)     | 3,097 (42.77)    | 3,826 (44.16)    | 3,440 (41.7)     |
| Radiation alone                                                                                                                                        | 1,557 (11.65)     | 1,065 (13.95)    | 1,044 (14.42)    | 1,278 (14.75)    | 1,448 (17.55)    |
| Surgery → adjuvant chemotherapy                                                                                                                        | 624 (4.67)        | 399 (5.22)       | 578 (7.98)       | 792 (9.14)       | 831 (10.07)      |
| Surgery → adjuvant radiation                                                                                                                           | 2,404 (17.99)     | 1,213 (15.88)    | 1,040 (14.36)    | 963 (11.11)      | 766 (9.28)       |
| Neoadjuvant radiation → surgery <sup>a</sup>                                                                                                           | 1,743 (13.05)     | 832 (10.89)      | 677 (9.35)       | 735 (8.48)       | 552 (6.69)       |
| Neoadjuvant radiation → surgery → adjuvant chemotherapy <sup>a</sup>                                                                                   | 901 (6.74)        | 563 (7.37)       | 418 (5.77)       | 588 (6.79)       | 471 (5.71)       |
| Multi-agent chemotherapy & radiation → surgery <sup>a</sup>                                                                                            | 661 (4.95)        | 311 (4.07)       | 180 (2.49)       | 216 (2.49)       | 341 (4.13)       |
| Multi-agent chemotherapy & radiation alone                                                                                                             | 263 (1.97)        | 139 (1.82)       | 115 (1.59)       | 148 (1.71)       | 271 (3.28)       |
| Neoadjuvant chemotherapy → surgery <sup>a</sup>                                                                                                        | 115 (0.86)        | 67 (0.88)        | 75 (1.04)        | 103 (1.19)       | 111 (1.35)       |
| Chemotherapy alone                                                                                                                                     | 25 (0.19)         | 16 (0.21)        | 17 (0.23)        | 15 (0.17)        | 19 (0.23)        |
| <sup>a</sup> Eligible for the subgroup analysis of pathologic complete response rates in Figure 3. Surgery is proctectomy or transanal local excision. |                   |                  |                  |                  |                  |
