# Supplementary material
Source: PubMed Central journal article supplement (PMC10636650)
Supplement: jamaoncol-e234845-s002.pdf [file jamaoncol-e234845-s002.pdf]

## Data Sharing Statement

Loria. Practice Patterns for Organ Preservation in US Patients with Rectal Cancer, 2006-2020. *JAMA Oncol.* Published November 09, 2023. doi:10.1001/jamaoncol.2023.4845

### Data

**Data available:** No

### Additional Information

**Explanation for why data not available:** Deidentified data is available to all Commission on Cancer (CoC) institutions and the data dictionaries are publicly available.
